# Supplementary material
Source: PubMed Central journal article supplement (PMC4567410)

Additional File 1

HIV-1 NL4-3 replication in H9 cells

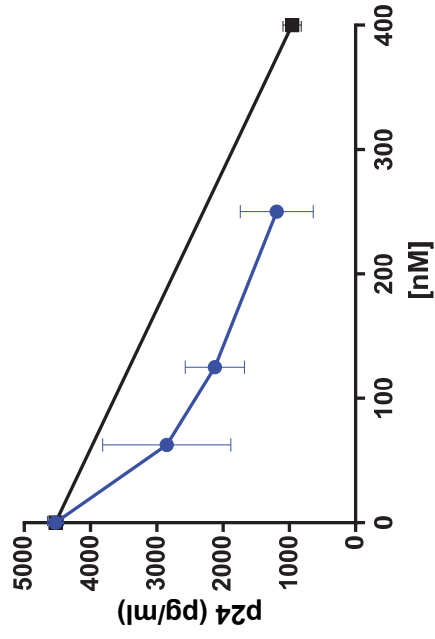

HIV-1 NL4-3 replication in SupT1 cells

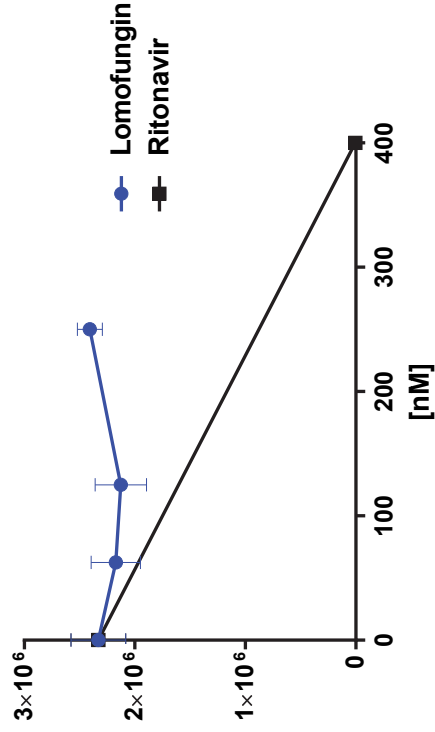

H9 cells viability (MTS)

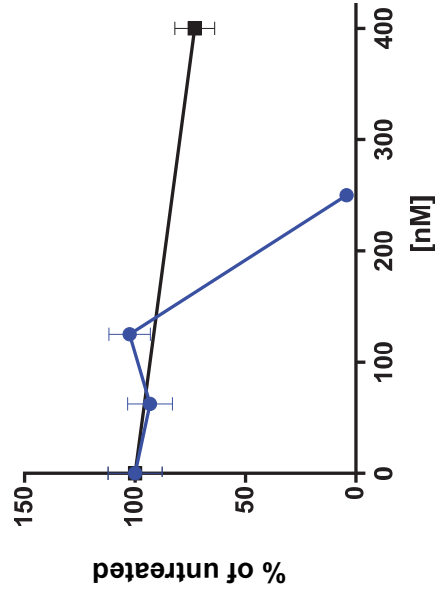

SupT1 cells viability (MTS)

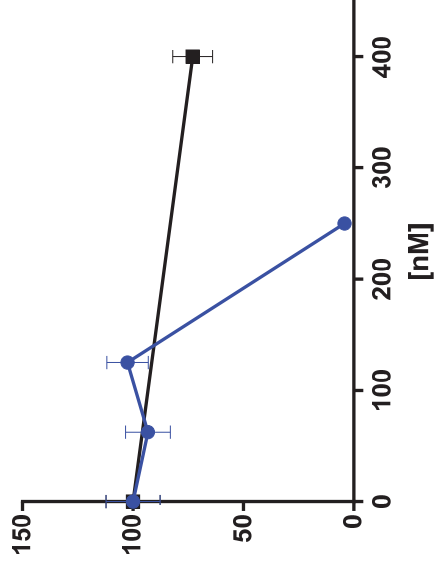

Supplement: NIHMS705461-supplement-1.pdf [file NIHMS705461-supplement-1.pdf]
