# Supplementary material
Source: PubMed Central journal article supplement (PMC4567410)
Supplement: NIHMS705461-supplement-2.pdf [file NIHMS705461-supplement-2.pdf]

Additional File 2

| Compound  | 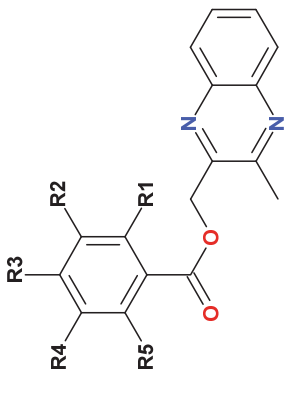 |                  |                                                                                     |                  |                  |
|-----------|-------------------------------------------------------------------------------------|------------------|-------------------------------------------------------------------------------------|------------------|------------------|
|           | R1                                                                                  | R2               | R3                                                                                  | R4               | R5               |
| Analog 1  | H                                                                                   | H                |  | H                | H                |
| Analog 3  | H                                                                                   | OCH <sub>3</sub> | OCH <sub>3</sub>                                                                    | OCH <sub>3</sub> | H                |
| Analog 4  | OCH <sub>3</sub>                                                                    | H                | H                                                                                   | H                | OCH <sub>3</sub> |
| Analog 5  | H                                                                                   | OCH <sub>3</sub> | H                                                                                   | OCH <sub>3</sub> | H                |
| Analog 6  | H                                                                                   | H                | OCH <sub>3</sub>                                                                    | OCH <sub>3</sub> | OCH <sub>3</sub> |
| Analog 7  | OCH <sub>3</sub>                                                                    | H                | OCH <sub>3</sub>                                                                    | OCH <sub>3</sub> | H                |
| Analog 8  | H                                                                                   | H                | H                                                                                   | CH <sub>3</sub>  | OH               |
| Analog 9  | H                                                                                   | H                | OH                                                                                  | H                | H                |
| Analog 10 | OH                                                                                  | H                | OH                                                                                  | H                | H                |
| Analog 11 | H                                                                                   | H                | CH <sub>3</sub>                                                                     | OH               | H                |

| Compound                 | Structure                                                                         |
|--------------------------|-----------------------------------------------------------------------------------|
| Lomofungin<br>(parental) | 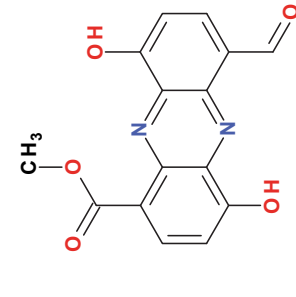 |
| Analog 2                 |  |
