# Supplementary material
Source: PubMed Central journal article supplement (PMC4567410)
Supplement: NIHMS705461-supplement-3.pdf [file NIHMS705461-supplement-3.pdf]

Additional File 3

| Compound ID | Vendor  | Vendor ID  | Virus Isolate | IC <sub>90</sub> (μM) | IC <sub>50</sub> (μM) | TC <sub>50</sub> (μM) | Therapeutic Index (TC <sub>50</sub> /IC <sub>50</sub> ) |
|-------------|---------|------------|---------------|-----------------------|-----------------------|-----------------------|---------------------------------------------------------|
| Analog 1    | Enamine | Z16251396  | 89BZ167       | > 100                 | > 100                 | > 100                 | N/A                                                     |
|             |         |            | 91US001       | > 100                 | > 100                 | > 100                 | N/A                                                     |
| Analog 2    | Enamine | Z17871239  | Ba-L          | > 100                 | > 100                 | > 100                 | N/A                                                     |
|             |         |            | 89BZ167       | > 100                 | > 100                 | > 100                 | N/A                                                     |
| Analog 3    | Enamine | Z18364182  | 91US001       | 90.1                  | 18                    | > 100                 | > 5.55                                                  |
|             |         |            | Ba-L          | > 100                 | > 100                 | > 100                 | N/A                                                     |
| Analog 4    | Enamine | Z18413098  | 89BZ167       | > 100                 | > 100                 | > 100                 | N/A                                                     |
|             |         |            | 91US001       | 71.7                  | 23.3                  | > 100                 | > 4.29                                                  |
| Analog 5    | Enamine | Z18414659  | 89BZ167       | 52.3                  | 17.8                  | > 100                 | > 5.61                                                  |
|             |         |            | 91US001       | > 100                 | 24.3                  | > 100                 | > 4.12                                                  |
| Analog 6    | Enamine | Z18441933  | 89BZ167       | > 100                 | > 100                 | > 100                 | N/A                                                     |
|             |         |            | 91US001       | > 100                 | > 100                 | > 100                 | N/A                                                     |
| Analog 7    | Enamine | Z18774468  | Ba-L          | > 100                 | > 100                 | > 100                 | N/A                                                     |
|             |         |            | 89BZ167       | > 100                 | 87.9                  | > 100                 | > 1.14                                                  |
| Analog 8    | Enamine | Z18889473  | 91US001       | > 100                 | 88.2                  | > 100                 | > 1.13                                                  |
|             |         |            | Ba-L          | > 100                 | > 100                 | > 100                 | N/A                                                     |
| Analog 9    | Enamine | Z19697264  | 89BZ167       | > 100                 | > 100                 | > 100                 | N/A                                                     |
|             |         |            | 91US001       | > 100                 | > 100                 | > 100                 | N/A                                                     |
| Analog 10   | Enamine | Z25218839  | Ba-L          | > 100                 | > 100                 | > 100                 | N/A                                                     |
|             |         |            | 89BZ167       | > 100                 | > 100                 | > 100                 | N/A                                                     |
| Analog 11   | Enamine | Z194472168 | 91US001       | > 100                 | > 100                 | > 100                 | N/A                                                     |
|             |         |            | Ba-L          | > 100                 | 27.3                  | > 100                 | > 3.66                                                  |
|             |         |            | 91US001       | > 100                 | > 100                 | > 100                 | N/A                                                     |
|             |         |            | Ba-L          | > 100                 | > 100                 | > 100                 | N/A                                                     |
